# Supplementary material for: Efficient photocatalytic hydrogen evolution under visible light by ternary composite CdS@NU-1000/RGO
Source: Royal Society of Chemistry journal article supplement (doi:10.1039/c7cy01254c), 2017-01-01
Supplement: c7cy01254c1.pdf [file c7cy01254c1.pdf]

## Supporting Information

# Efficient photocatalytic hydrogen evolution under visible light by ternary composite CdS@NU-1000/RGO

Partha Pratim Bag<sup>a,b#,\*</sup> Xu-Sheng Wang<sup>a,#</sup>, Pathik Sahoo<sup>b</sup> Jinhua Xiong<sup>c</sup> and Rong Cao<sup>a,\*</sup>

<sup>a</sup>State Key Laboratory of Structural Chemistry, Fujian Institute of Research on the Structure of Matter, Chinese Academy of Sciences, Fujian, Fuzhou 350002, P. R. China. E-mail: parthap.bag82@yahoo.com, (PPB), rcao@fjirsm.ac.cn; Fax: +86-591-83796710; Tel: +86-591-83725186.

<sup>b</sup>MOE Key Laboratory of Bioinorganic and Synthetic Chemistry, School of Chemistry, Sun Yat-Sen University, Guangzhou 510275, P. R. China.

<sup>c</sup>State Key Laboratory of Photocatalysis on Energy and Environment, Fuzhou University, Fuzhou 350002, P. R. China.

<sup>#</sup> P. P. Bag and X. -S. Wang contributed equally to this work.

### Synthesis of 1,3,6,8-tetrakis(p-benzoic acid)pyrene 1,3,6,8-tetrakis(pbenzoic acid) pyrene (TBAPy).

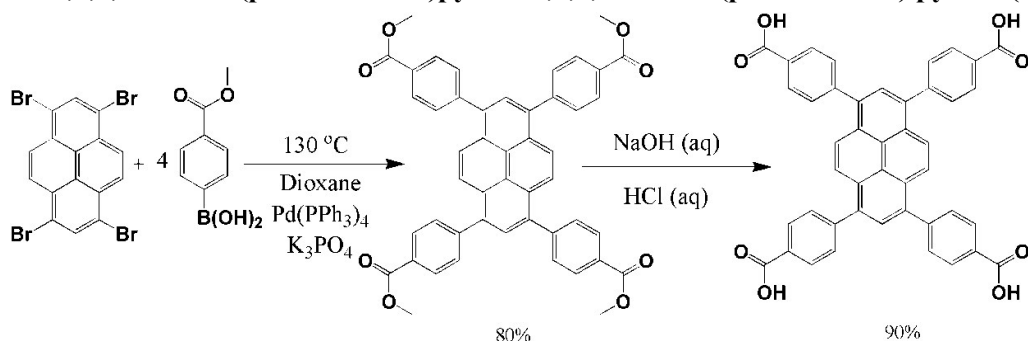

**Scheme S1.** Synthetic procedure of TBAPy.

The synthesis was performed according to the previous literature.<sup>15</sup> (The ref. belongs to main draft)

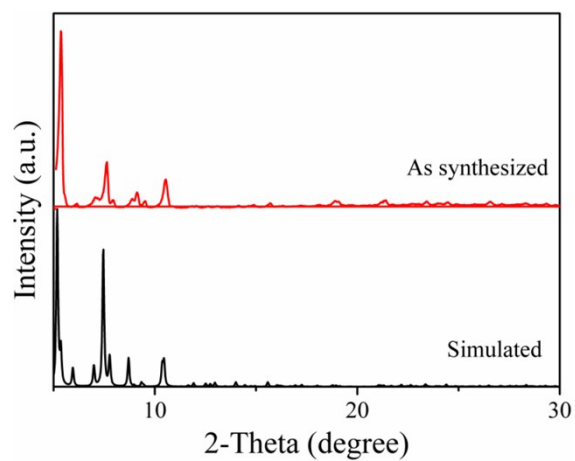

**Figure S1.**The XRD pattern of NU-1000.

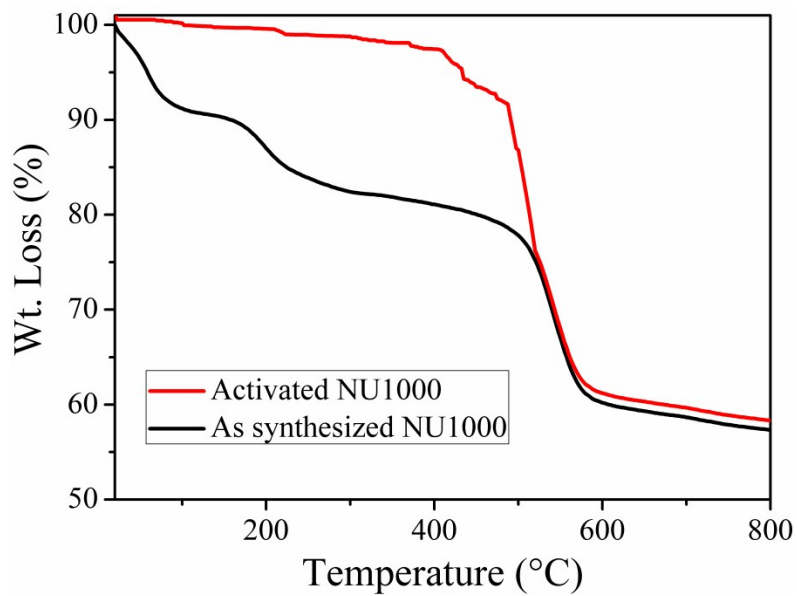

**Figure S2.**The thermogravimetric graph of NU-1000 under nitrogen atmosphere.

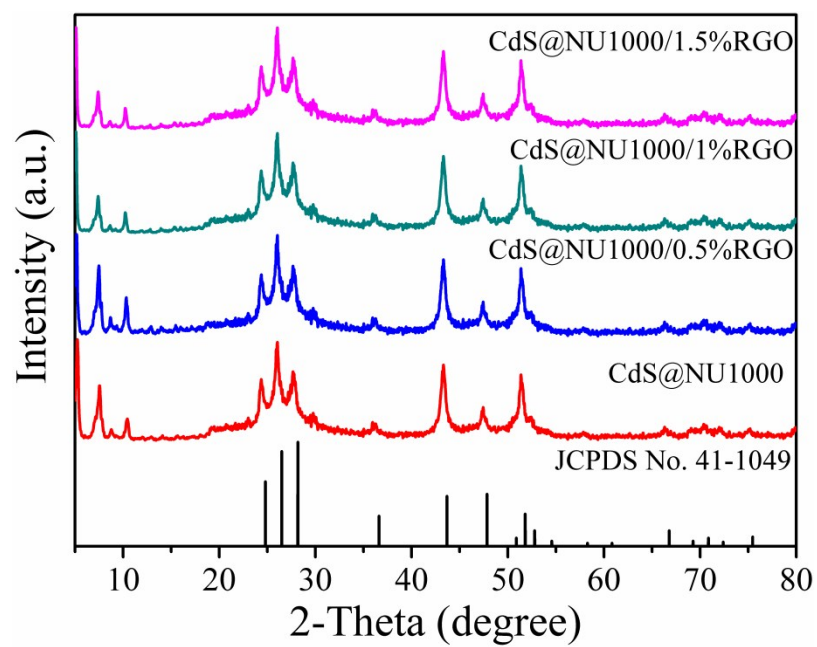

**Figure S3.** The PXRD of CdS contained composites.

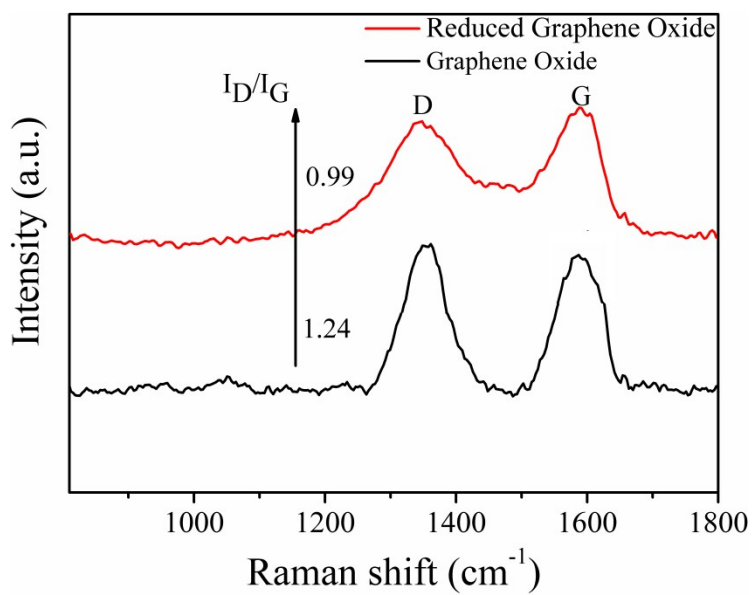

**Figure S4.** The Raman spectra of GO and RGO.

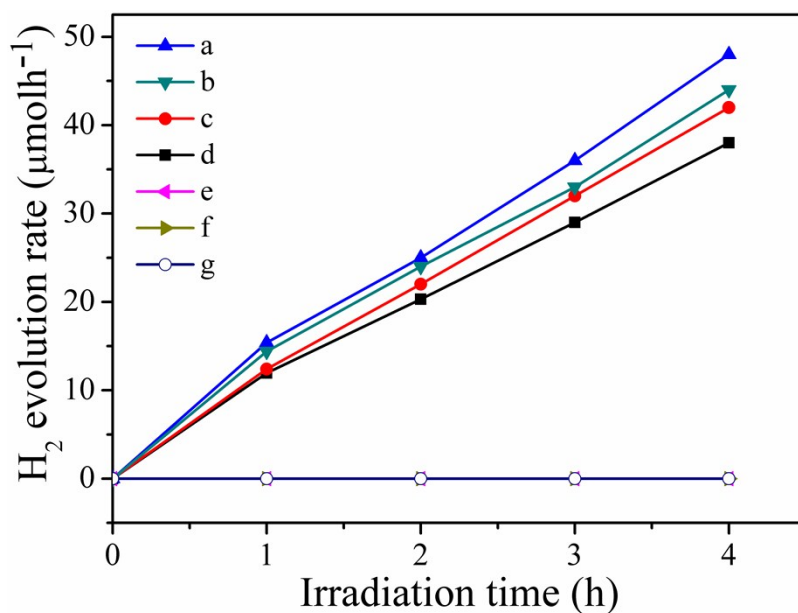

**Figure S5.** The hydrogen production activity of (a) CdS@NU-1000/1%RGO; (b) CdS@NU100/1.5%RGO; (c) CdS@NU-1000/0.5%RGO; (d) CdS@NU-1000; (e) NU-1000; (f) RGO; (g) CdS@NU-1000/1%RGO in the dark.

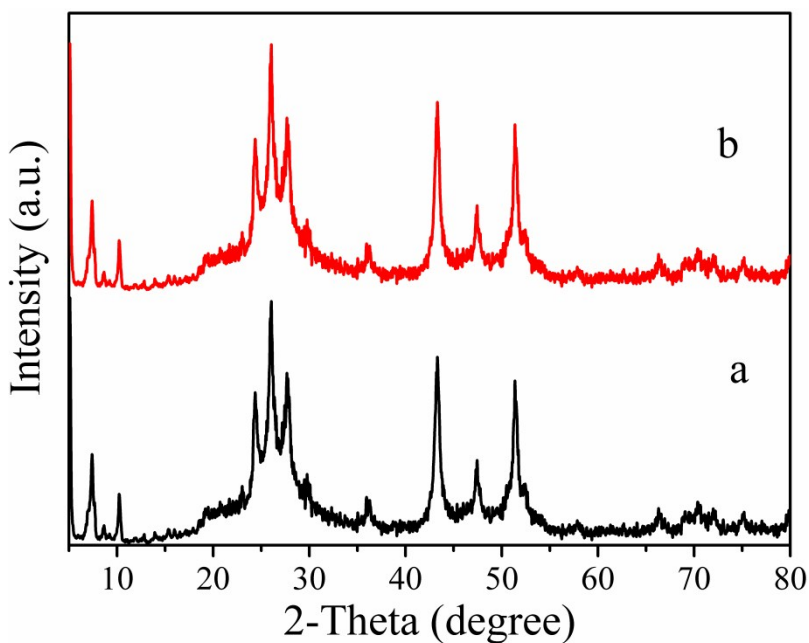

**Figure S6.** The PXRD patterns of (a) fresh CdS@NU-1000/1%RGO and (b) CdS@NU-1000/1%RGO after water splitting reaction without the addition of sacrificial agents.

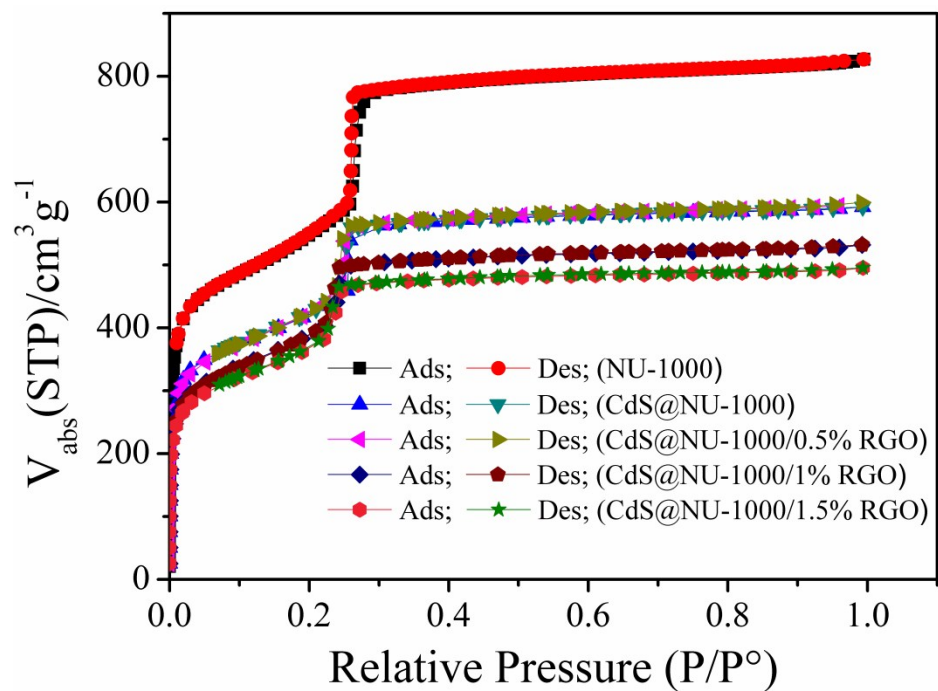

**Figure S7** The  $N_2$  adsorption/desorption isotherms.

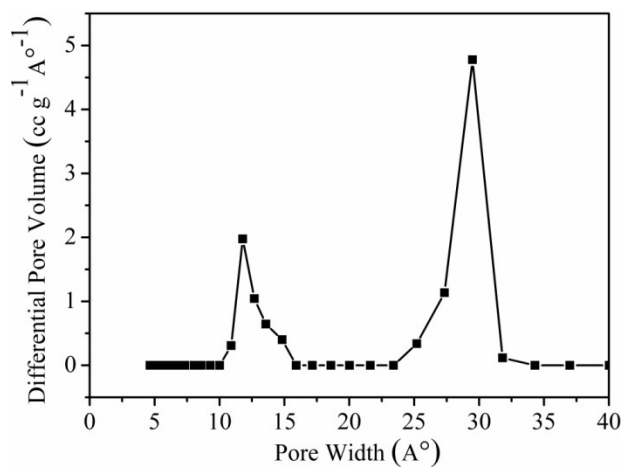

**Figure S8** Pore width of NU-1000.

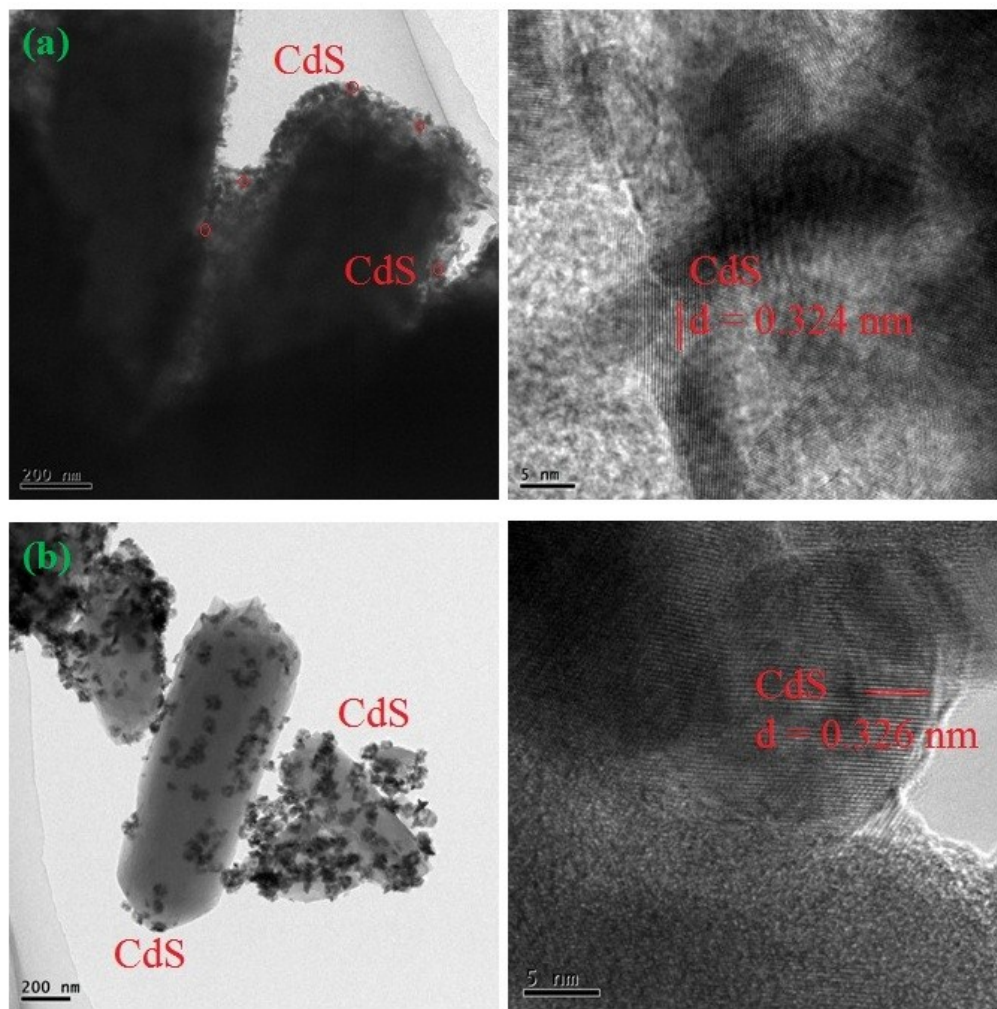

**Figure S9.** The TEM and HRTEM image of (a) H-CdS@NU-1000/1%RGO and (b) L-CdS@NU-1000/1%RGO.

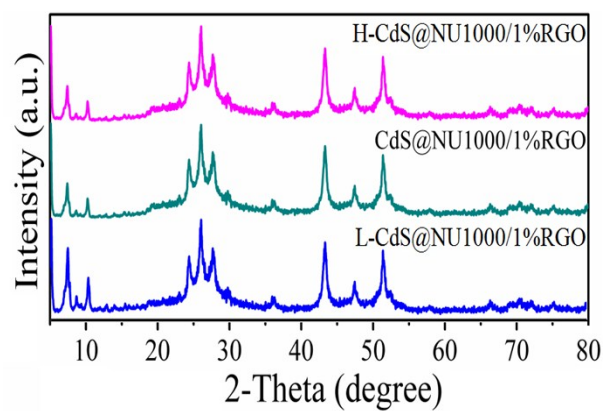

**Figure S10.** PXRD pattern of all three composite materials.

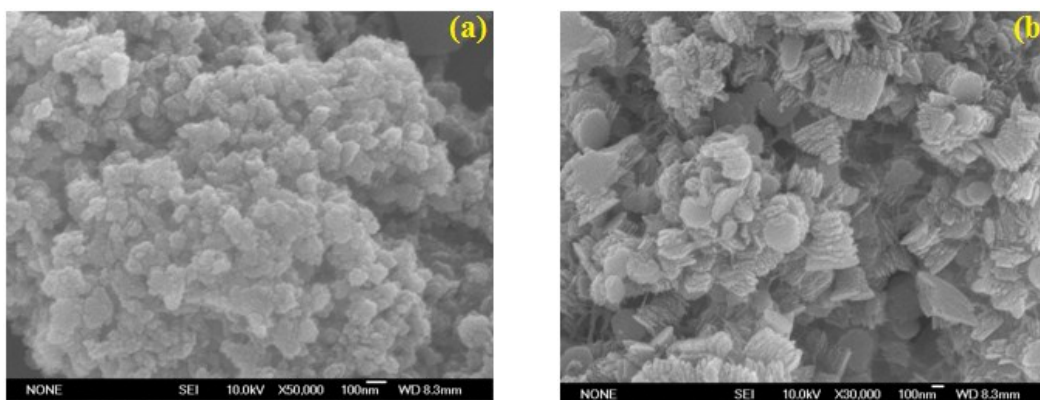

**Figure S11.**(a) The SEM graph of CdS@NU-1000 and (b)The SEM graph of CdS@NU-1000/1%RGO.

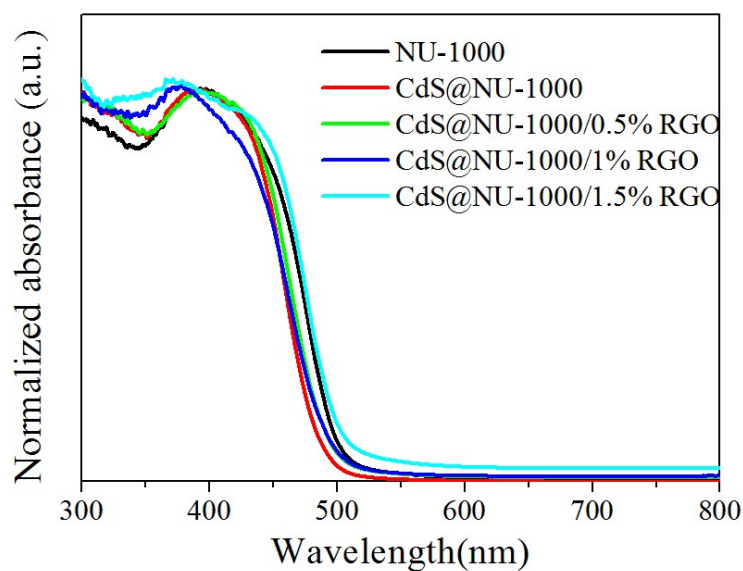

**Figure S12.**The diffraction reflectance spectra: (a) NU-1000; (b) CdS@NU100/0.5%RGO; (c)CdS@NU-1000; (d)CdS@NU-1000/1%RGO; (e) CdS@NU-1000/1.5%RGO.

**Table. S1** The weight ration of CdS and NU-1000 and their activity

| Samples             | CdS:NU-1000<br>(wt/wt) | Activity<br>( $\mu\text{mol h}^{-1}$ ) | CdS wt% | Activity<br>( $\text{mmol g}_{\text{CdS}}^{-1} \text{h}^{-1}$ ) /Times<br>of activity over CdS |
|---------------------|------------------------|----------------------------------------|---------|------------------------------------------------------------------------------------------------|
| L-CdS@NU-1000/1%RGO | 1 : 12.5               | 5.9                                    | 7.39    | 1.60/ <b>8.0</b>                                                                               |
| CdS@NU-1000/1%RGO   | 1 : 9.1                | 12                                     | 9.93    | 2.42/ <b>12.1</b>                                                                              |
| H-CdS@NU-1000/1%RGO | 1 : 4.8                | 8.55                                   | 17.36   | 0.99/ <b>4.95</b>                                                                              |



### Quantum efficiency calculations.

In the following we describe the QE determination at  $\lambda_0=420$  nm for CdS@NU-1000/1% RGO. The catalyst solution was irradiated by a 300W Xe lamp applying a  $\lambda_0\pm 7.5$  nm band-pass filter for 4 hours. The average intensity of irradiation was determined to be  $163.7 \text{ mW}\cdot\text{cm}^{-2}$  by a light intensity meter, and the irradiation area was  $18.09 \text{ cm}^2$ . The number of incident photons (N) is  $2.25\times 10^{22}$  as calculated by equation (1). The amount of  $\text{H}_2$  molecules generated per hour was  $2.56 \text{ }\mu\text{mol}$ . The quantum efficiency is calculated from equation (2).

$$N = \frac{E \lambda}{hc} \quad (1)$$

$$\text{QE} = 2 \times \frac{\text{the number of evolved } \text{H}_2 \text{ molecules}}{\text{the number of incident photons}} \times 100 \% \quad (2)$$

**Table. S2**

| CdS@NU-1000/1% RGO | Activity ( $\mu\text{mol/h}$ ) | QE      |
|--------------------|--------------------------------|---------|
| 420 nm             | 2.56                           | 0.0137% |
| 450 nm             | 2.24                           | 0.0114% |
| 475 nm             | 1.63                           | 0.0073% |

**Table. S3 The mass fraction of CdS in the composite**

| Samples             | Cd wt% (ICP) | S wt% (Elemental Analysis) | CdS wt% |
|---------------------|--------------|----------------------------|---------|
| CdS@NU-1000         | 5.72         | 4.46                       | 10.18   |
| CdS@NU-1000/1%RGO   | 5.67         | 4.26                       | 9.93    |
| L-CdS@NU-1000/1%RGO | 4.14         | 3.25                       | 7.39    |
| M-CdS@NU-1000/1%RGO | 11.77        | 5.59                       | 17.36   |
